# Supplementary material
Source: PubMed Central journal article supplement (PMC8802425)
Supplement: 13063_2021_5859_MOESM1_ESM.pdf [file 13063_2021_5859_MOESM1_ESM.pdf]

**Process Indicators**

|                                                          | <b>Indicator</b>                | <b>Frequency of data collection</b> | <b>Person collecting</b> | <b>Source of data</b> | <b>Tool required</b> | <b>Data type</b> |
|----------------------------------------------------------|---------------------------------|-------------------------------------|--------------------------|-----------------------|----------------------|------------------|
| <b>Intervention indicators (community groups)</b>        |                                 |                                     |                          |                       |                      |                  |
| Intervention fidelity                                    | Training fidelity (facilitator) | Once                                | Jigawa UCH manager       | Observation           | Checklist            | Mixed            |
|                                                          | Number of sessions conducted    | Monthly                             | Facilitator              | Register              | Log book             | Quantitative     |
|                                                          | Content of sessions             | Monthly                             | Facilitator              | Register              | Log book             | Quantitative     |
|                                                          | Participatory-ness of sessions  | Monthly                             | Facilitator              | Register              | Log book             | Mixed            |
|                                                          | Supervision visits conducted    | Monthly                             | STC supervisor           | Work plans            | Work plan            | Quantitative     |
| Intervention reach                                       | Number of attendees             | Monthly                             | Facilitator              | Register              | Log book             | Quantitative     |
|                                                          | Profile of attendees            | Monthly                             | Facilitator              | Register              | Log book             | Quantitative     |
|                                                          | Distance travelled              | Monthly                             | Facilitator              | Register              | Log book             | Quantitative     |
| Facilitator characteristics                              | Number trained to competency    | Once                                | STC trainer              | Observation           | Checklist            | Quantitative     |
|                                                          | Number retained                 | Once                                | STC trainer              | HR records            | Questionnaire        | Quantitative     |
|                                                          | Facilitator profiles            | Once                                | STC trainer              | HR records            | Questionnaire        | Quantitative     |
|                                                          | Intervention strategies         | Once                                | Facilitator              | Register              | Log book             | Quantitative     |
|                                                          | Trainer/supervisor perceptions  | Midline/endline                     | UCH data collectors      | Interviews            | Topic guide          | Qualitative      |
|                                                          | Facilitator perceptions         | Midline/endline                     | UCH data collectors      | Group discussions     | Topic guide          | Qualitative      |
| <b>Intervention indicators (community-facility link)</b> |                                 |                                     |                          |                       |                      |                  |
| Intervention fidelity                                    | Training fidelity (facilitator) | Once                                | Field manager            | Observation           | Checklist            | Mixed            |
|                                                          | Number of sessions conducted    | Monthly                             | Facilitator              | Register              | Log book             | Quantitative     |
|                                                          | Content of sessions             | Monthly                             | Facilitator              | Register              | Log book             | Quantitative     |
|                                                          | Action points developed         | Monthly                             | Facilitator              | Register              | Log book             | Quantitative     |
|                                                          | Action points delivered         | Monthly                             | Facilitator              | Register              | Log book             | Quantitative     |
| Intervention reach                                       | Number of attendees             | Monthly                             | Facilitator              | Register              | Log book             | Quantitative     |
|                                                          | Profile of attendees            | Monthly                             | Facilitator              | Register              | Log book             | Quantitative     |
|                                                          | Distance travelled              | Monthly                             | Facilitator              | Register              | Log book             | Quantitative     |
| Facilitator characteristics                              | Number trained to competency    | Once                                | STC trainer              | Observation           | Checklist            | Quantitative     |
|                                                          | Number retained                 | Once                                | STC trainer              | HR records            | Questionnaire        | Quantitative     |
|                                                          | Facilitator profiles            | Once                                | STC trainer              | HR records            | Questionnaire        | Quantitative     |

|                                          |                                |                  |                     |                      |                 |              |
|------------------------------------------|--------------------------------|------------------|---------------------|----------------------|-----------------|--------------|
|                                          | Intervention strategies        | Once             | Facilitator         | Register             | Log book        | Quantitative |
|                                          | Trainer/supervisor perceptions | Midline/endline  | UCH data collectors | Interviews           | Topic guide     | Qualitative  |
|                                          | Facilitator perceptions        | Midline/endline  | UCH data collectors | Group discussions    | Topic guide     | Qualitative  |
| Intervention indicators (health systems) |                                |                  |                     |                      |                 |              |
| Intervention fidelity                    | Training fidelity              | Once             | Jigawa STC manager  | Observation          | Checklist       | Mixed        |
|                                          | Pre/Post testing               | Once             | STC trainer         | Survey               | Questionnaire   | Quantitative |
|                                          | Supervision reports            | Monthly          | STC supervisor      | Observation          | Checklist       | Qualitative  |
|                                          | Supervision visits conducted   | Monthly          | STC supervisor      | Work plans           | Work plans      | Quantitative |
|                                          | Training coverage over time    | Biannual         | STC trainer         | Observation          | Checklist       | Quantitative |
|                                          | Oxygen system functionality    | Base/mid/endline | UCH data collectors | Audit                | Questionnaire   | Quantitative |
|                                          | Oximeter functionality         | Base/mid/endline | UCH data collectors | Audit                | Questionnaire   | Quantitative |
| Facilitator characteristics              | Trainer/supervisor perceptions | Midline/endline  | UCH data collectors | Interviews           | Topic guide     | Qualitative  |
|                                          | Provider perceptions           | Midline/endline  | UCH data collectors | Group discussions    | Topic guide     | Qualitative  |
| Context                                  | Drug stock audits              | Quarterly        | STC supervisor      | Observation          | Questionnaire   | Quantitative |
|                                          | Supply chain audits            | Quarterly        | STC supervisor      | Observation          | Questionnaire   | Quantitative |
|                                          | HMIS audits                    | Quarterly        | STC supervisor      | Observation          | Questionnaire   | Quantitative |
| Clinical indicators                      |                                |                  |                     |                      |                 |              |
|                                          | Total case numbers             | Quarterly        | Jigawa UCH manager  | Facility register    | Extraction tool | Quantitative |
|                                          | Proportion pneumonia diagnoses | Quarterly        | Jigawa UCH manager  | Facility register    | Extraction tool | Quantitative |
|                                          | Correct IMCI assessment        | Quarterly        | Jigawa UCH manager  | Facility register    | Extraction tool | Quantitative |
|                                          | Correct IMCI diagnosis         | Quarterly        | Jigawa UCH manager  | Facility register    | Extraction tool | Quantitative |
|                                          | Correct treatment decision     | Quarterly        | Jigawa UCH manager  | Facility register    | Extraction tool | Quantitative |
|                                          | Correct referral decision      | Quarterly        | Jigawa UCH manager  | Facility register    | Extraction tool | Quantitative |
|                                          | Oxygen treatment               | Base/mid/endline | Data collector      | Household interviews | Questionnaire   | Quantitative |
|                                          | Secondary care CFR             | Quarterly        | Jigawa UCH manager  | Facility register    | Extraction tool | Quantitative |
|                                          | Pneumonia point prevalence     | Base/mid/endline | Data collector      | Household interviews | Questionnaire   | Quantitative |
|                                          | Pneumonia 2-week prevalence    | Base/mid/endline | Data collector      | Household interviews | Questionnaire   | Quantitative |
|                                          | Malnutrition                   | Base/mid/endline | Data collector      | Household interviews | Questionnaire   | Quantitative |
| Community behaviours                     |                                |                  |                     |                      |                 |              |
|                                          | Immunisation                   | Base/mid/endline | Data collector      | Household interviews | Questionnaire   | Quantitative |

|                                |                   |                |                      |               |              |
|--------------------------------|-------------------|----------------|----------------------|---------------|--------------|
| Exclusive breastfeeding        | Base/mid/endpoint | Data collector | Household interviews | Questionnaire | Quantitative |
| Cooking fuel                   | Base/mid/endpoint | Data collector | Household interviews | Questionnaire | Quantitative |
| Water and Sanitation           | Base/mid/endpoint | Data collector | Household interviews | Questionnaire | Quantitative |
| Vitamin A                      | Base/mid/endpoint | Data collector | Household interviews | Questionnaire | Quantitative |
| Soap for handwashing           | Base/mid/endpoint | Data collector | Household interviews | Questionnaire | Quantitative |
| Location of first seeking care | Base/mid/endpoint | Data collector | Household interviews | Questionnaire | Quantitative |
| Any care seeking               | Base/mid/endpoint | Data collector | Household interviews | Questionnaire | Quantitative |
| Smoking exposure               | Base/mid/endpoint | Data collector | Household interviews | Questionnaire | Quantitative |
| TB exposure                    | Base/mid/endpoint | Data collector | Household interviews | Questionnaire | Quantitative |

### ***Economic Indicators***

|                                          | <b>Indicator</b>         | <b>Frequency of data collection</b> | <b>Person collecting</b> | <b>Source of data</b> | <b>Tool required</b> | <b>Data type</b> |
|------------------------------------------|--------------------------|-------------------------------------|--------------------------|-----------------------|----------------------|------------------|
| <b>Provider side (community group)</b>   |                          |                                     |                          |                       |                      |                  |
| Start-up costs                           | Training facilitators    | Baseline                            | STC administration       | STC accounts          | Budget tool          | Quantitative     |
|                                          | Facilitator recruitment  | Baseline                            | STC administration       | STC accounts          | Budget tool          | Quantitative     |
|                                          | Community entry          | Baseline                            | STC administration       | STC accounts          | Budget tool          | Quantitative     |
| Implementation costs                     | Equipment                | Endpoint                            | STC administration       | STC accounts          | Budget tool          | Quantitative     |
|                                          | Facilitators allowances  | Endpoint                            | STC administration       | STC accounts          | Budget tool          | Quantitative     |
|                                          | Supervisor salaries      | Endpoint                            | STC administration       | STC accounts          | Budget tool          | Quantitative     |
|                                          | Supervision costs        | Endpoint                            | STC administration       | STC accounts          | Budget tool          | Quantitative     |
|                                          | Overhead/infrastructures | Endpoint                            | STC administration       | STC accounts          | Budget tool          | Quantitative     |
| Time cost                                | Travel time and cost     | Monthly                             | Facilitators             | Meeting registers     | Log-book             | Quantitative     |
|                                          | Meeting duration         | Monthly                             | Facilitators             | Meeting registers     | Log-book             | Quantitative     |
| <b>Patient side (community meetings)</b> |                          |                                     |                          |                       |                      |                  |
| Meeting attendance                       | Travel time and cost     | Mid/endpoint                        | UCH data collector       | Household survey      | Questionnaire        | Quantitative     |
|                                          | Meeting duration         | Mid/endpoint                        | UCH data collector       | Household survey      | Questionnaire        | Quantitative     |
|                                          | Opportunity costs        | Mid/endpoint                        | UCH data collector       | Household survey      | Questionnaire        | Quantitative     |

|                                                  |                               |                  |                    |                   |               |              |
|--------------------------------------------------|-------------------------------|------------------|--------------------|-------------------|---------------|--------------|
| Group activities                                 | Time spent on group activity  | Mid/endline      | UCH data collector | Household survey  | Questionnaire | Quantitative |
|                                                  | Money spent on group activity | Mid/endline      | UCH data collector | Household survey  | Questionnaire | Quantitative |
|                                                  | Income generating activities  | Once             | UCH data collector | One-off survey    | Questionnaire | Quantitative |
| Provider side (community-facility link)          |                               |                  |                    |                   |               |              |
| Start-up costs                                   | Training facilitators         | Baseline         | STC administration | STC accounts      | Budget tool   | Quantitative |
|                                                  | Facilitator recruitment       | Baseline         | STC administration | STC accounts      | Budget tool   | Quantitative |
|                                                  | Community entry               | Baseline         | STC administration | STC accounts      | Budget tool   | Quantitative |
| Implementation costs                             | Facilitators allowances       | Endline          | STC administration | STC accounts      | Budget tool   | Quantitative |
|                                                  | Supervisor salaries           | Endline          | STC administration | STC accounts      | Budget tool   | Quantitative |
|                                                  | Supervision costs             | Endline          | STC administration | STC accounts      | Budget tool   | Quantitative |
|                                                  | Overhead/infrastructures      | Endline          | STC administration | STC accounts      | Budget tool   | Quantitative |
| Time cost                                        | Travel time and cost          | Monthly          | Facilitators       | Meeting registers | Log-book      | Quantitative |
|                                                  | Meeting duration              | Monthly          | Facilitators       | Meeting registers | Log-book      | Quantitative |
| Patient side (community-facility link)           |                               |                  |                    |                   |               |              |
| Meeting attendance                               | Travel time and cost          | Mid/endline      | UCH data collector | Household survey  | Questionnaire | Quantitative |
|                                                  | Meeting duration              | Mid/endline      | UCH data collector | Household survey  | Questionnaire | Quantitative |
|                                                  | Opportunity costs             | Mid/endline      | UCH data collector | Household survey  | Questionnaire | Quantitative |
| Group activities                                 | Time spent on group activity  | Mid/endline      | UCH data collector | Household survey  | Questionnaire | Quantitative |
|                                                  | Money spent on group activity | Mid/endline      | UCH data collector | Household survey  | Questionnaire | Quantitative |
| Provider side (PPE/IPC and oxygen strengthening) |                               |                  |                    |                   |               |              |
| Start-up costs                                   | IPC/PPE training              | Endline          | STC administration | STC accounts      | Budget tool   | Quantitative |
|                                                  | IPC/PPE equipment             | Endline          | STC administration | STC accounts      | Budget tool   | Quantitative |
|                                                  | Pulse oximeters               | Endline          | UCL                | UCL accounts      | Invoices      | Quantitative |
|                                                  | Oxygen concentrators          | Endline          | UCL                | UCL accounts      | Invoices      | Quantitative |
|                                                  | Pulse oximetry training       | Endline          | Oxygen for Life    | OLI accounts      | Invoices      | Quantitative |
|                                                  | Oxygen training               | Endline          | Oxygen for Life    | OLI accounts      | Invoices      | Quantitative |
| Implementation costs                             | Supervision                   | Endline          | STC administration | STC accounts      | Budget tool   | Quantitative |
|                                                  | Salaries                      | Endline          | STC administration | STC accounts      | Budget tool   | Quantitative |
|                                                  | Maintenance                   | Endline          | STC administration | STC accounts      | Budget tool   | Quantitative |
| Time cost                                        | Time use                      | Baseline/endline | UCH data collector | Observation       | Checklist     | Quantitative |

| Patient side (Health system strengthening) |                   |                    |                  |               |              |  |
|--------------------------------------------|-------------------|--------------------|------------------|---------------|--------------|--|
| Cost to patient                            | Baseline/endpoint | UCH data collector | Household survey | Questionnaire | Quantitative |  |
| Caregiver motivations                      | Baseline/endpoint | UCH data collector | Household survey | Questionnaire | Quantitative |  |
| Time taken to seek care                    | Baseline/endpoint | UCH data collector | Household survey | Questionnaire | Quantitative |  |

STC: Save the Children; UCH: University College Hospital Ibadan; OLI: Oxygen for Life Initiative; IPC: Infection prevention and control; PPE: personal protective equipment
